# Supplementary material
Source: PubMed Central journal article supplement (PMC8732318)
Supplement: NIHMS1752914-supplement-Supplementary_Information.pdf [file NIHMS1752914-supplement-Supplementary_Information.pdf]

# Rapid pathogen-specific recruitment of immune effector cells in the skin by secreted toxins

Thuan H. Nguyen, Gordon Y.C. Cheung, Kevin M. Rigby, Olena Kamenyeva, Juraj Kabat, Daniel E. Sturdevant, Amer E. Villaruz, Ryan Liu, Pipat Piewngam, Adeline R. Porter, Saba Firdous, Janice Chiou, Matthew D. Park, Rachelle L. Hunt, Fawaz M. F. Almufarriji, Vee Y. Tan, Titus K. Asiamah, Joshua W. McCausland, Emilie L. Fisher, Anthony J. Yeh, Justin S. Bae, Scott D. Kobayashi, Ji Ming Wang, Daniel L. Barber, Frank R. DeLeo, Michael Otto

## Supplementary Information

**Supplementary Tab. 1. Predominant early gene induction in neutrophils upon stimulation by *S. aureus* culture filtrate \***

| Gene name                 |                                                                                                          | Expression change (LAC vs. PMN control) |        |         | Expression change (LAC vs. $\Delta$ psm) |        |         |
|---------------------------|----------------------------------------------------------------------------------------------------------|-----------------------------------------|--------|---------|------------------------------------------|--------|---------|
|                           |                                                                                                          | 30 min                                  | 60 min | 180 min | 30 min                                   | 60 min | 180 min |
| ACTL7A                    | actin-like 7A                                                                                            | 1.0                                     | 13.4   | 5.5     | 1.4                                      | 3.2    | 1.3     |
| ADAMTS5                   | ADAM metallopeptidase with thrombospondin type 1 motif, 5                                                | 24.8                                    | 1.8    | 1.7     | 1.3                                      | 1.4    | 9.1     |
| ANGEL1                    | angel homolog 1 (Drosophila)                                                                             | 4.3                                     | 1.2    | 2.4     | 14.1                                     | -1.8   | 1.6     |
| ARSK                      | arylsulfatase family, member K                                                                           | 1.7                                     | 1.2    | 3.6     | 53.4                                     | 1.1    | 1.6     |
| BRE-AS1                   | BRE antisense RNA 1 (non-protein coding)                                                                 | 11.6                                    | 26.7   | 20.0    | 9.2                                      | 13.1   | 7.3     |
| C11orf96                  | chromosome 11 open reading frame 96                                                                      | -1.2                                    | 2.0    | 24.5    | -1.7                                     | 3.9    | 3.6     |
| C15orf48                  | chromosome 15 open reading frame 48                                                                      | 1.4                                     | 17.1   | 38.9    | -1.2                                     | 9.8    | 9.1     |
| C1orf51                   | chromosome 1 open reading frame 51                                                                       | 4.0                                     | 1.8    | 2.6     | 14.7                                     | 1.1    | 1.7     |
| CCL20                     | chemokine (C-C motif) ligand 20                                                                          | 4.6                                     | 54.4   | 38.2    | 2.3                                      | 30.2   | 94.9    |
| CXCL2                     | chemokine (C-X-C motif) ligand 2                                                                         | 2.5                                     | 30.2   | 15.5    | 2.6                                      | 9.3    | 6.2     |
| DKFZP434F142              | uncharacterized DKFZp434F142                                                                             | 2.6                                     | -1.1   | -1.1    | 1.2                                      | 13.1   | -1.7    |
| DLG1                      | Discs, large homolog 1 (Drosophila)                                                                      | 1.5                                     | 22.7   | -1.9    | -1.0                                     | 1.6    | -1.0    |
| DNM3OS                    | DNM3 opposite strand/antisense RNA (non-protein coding)                                                  | 1.9                                     | 2.1    | 37.7    | -2.3                                     | 2.7    | 1.6     |
| DUSP2                     | dual specificity phosphatase 2                                                                           | 4.9                                     | 18.3   | 20.5    | 4.4                                      | 6.8    | 3.3     |
| EGR1                      | early growth response 1                                                                                  | 191.7                                   | 122.8  | 7.8     | 272.8                                    | 223.0  | 14.6    |
| EGR2                      | early growth response 2                                                                                  | 9.0                                     | 11.8   | 6.0     | 11.4                                     | 9.1    | 3.2     |
| EGR3                      | early growth response 3                                                                                  | 5.6                                     | 7.2    | 6.8     | 10.5                                     | 7.4    | 7.4     |
| EHD4                      | EH-domain containing 4                                                                                   | 2.3                                     | 22.5   | 1.8     | 1.8                                      | 7.8    | 1.1     |
| EIF1                      | eukaryotic translation initiation factor 1                                                               | 5.6                                     | 15.1   | 2.0     | 5.5                                      | 10.0   | 2.3     |
| EREG                      | epiregulin                                                                                               | -1.1                                    | 3.1    | 21.3    | 1.2                                      | 1.9    | 1.5     |
| FANCI                     | Fanconi anemia, complementation group I                                                                  | 15.7                                    | 1.2    | 1.2     | -1.1                                     | 1.1    | 2.4     |
| FKBP4                     | FK506 binding protein 4, 59kDa                                                                           | 14.2                                    | 13.6   | -4.4    | 1.4                                      | 6.6    | 1.3     |
| FLT1                      | fms-related tyrosine kinase 1 (vascular endothelial growth factor/vascular permeability factor receptor) | -2.9                                    | -2.0   | 35.8    | -2.2                                     | -1.0   | 3.9     |
| FOSB                      | FBJ murine osteosarcoma viral oncogene homolog B                                                         | 3.7                                     | 6.1    | 17.2    | 4.5                                      | 6.0    | 32.2    |
| FOSL1                     | FOS-like antigen 1                                                                                       | 1.4                                     | 10.1   | 13.7    | 2.3                                      | 6.8    | 7.3     |
| FUT5                      | fucosyltransferase 5 (alpha (1,3) fucosyltransferase)                                                    | 1.6                                     | 6.6    | 1.1     | 4.1                                      | 11.4   | 4.1     |
| G0S2                      | G0/G1switch 2                                                                                            | 2.4                                     | 6.0    | 24.3    | 1.8                                      | 2.1    | 4.1     |
| HBEGF                     | heparin-binding EGF-like growth factor                                                                   | 1.1                                     | 10.4   | 1.2     | 1.1                                      | 7.9    | 2.5     |
| IL1A                      | interleukin 1, alpha                                                                                     | 1.9                                     | 16.5   | 26.2    | 3.5                                      | 8.2    | 8.6     |
| IL1RL2                    | interleukin 1 receptor-like 2                                                                            | 3.9                                     | 10.4   | 41.0    | 1.1                                      | 5.4    | 4.6     |
| INSR                      | insulin receptor                                                                                         | -1.0                                    | 5.2    | 32.7    | 3.7                                      | 3.5    | 3.1     |
| KCTD7 / RABGEF1           | potassium channel tetramerisation domain containing 7 / RAB guanine nucleotide exchange factor (GEF) 1   | 20.0                                    | 5.9    | 1.2     | 2.8                                      | 1.0    | 3.4     |
| LAMB3                     | laminin, beta 3                                                                                          | 1.1                                     | 6.9    | 24.1    | 2.0                                      | 5.1    | 9.0     |
| LIF                       | leukemia inhibitory factor                                                                               | 1.8                                     | 4.2    | 7.0     | 1.5                                      | 14.5   | 2.1     |
| LOC100130264              | uncharacterized LOC100130264                                                                             | 46.9                                    | 8.1    | 1.8     | 2.7                                      | 2.8    | 1.0     |
| LOC100507065              | uncharacterized LOC100507065                                                                             | -1.2                                    | -1.5   | 4.1     | -1.2                                     | -1.2   | 27.5    |
| LOC100653132 <sup>†</sup> | uncharacterized LOC100653132                                                                             | 117.9                                   | 104.6  | 13.3    | 55.6                                     | 61.2   | 17.9    |
| LOC441666                 | zinc finger protein 91 pseudogene                                                                        | 3.0                                     | 1.6    | 24.8    | -1.4                                     | 9.7    | 2.1     |
| MAP3K2                    | mitogen-activated protein kinase kinase 2                                                                | 1.6                                     | 1.2    | 5.1     | 1.8                                      | 10.1   | 2.4     |
| NR4A3                     | nuclear receptor subfamily 4, group A, member 3                                                          | 3.0                                     | 11.7   | 2.1     | 5.6                                      | 5.3    | 2.2     |
| OSM                       | oncostatin M                                                                                             | 6.7                                     | 28.4   | 9.4     | 5.8                                      | 10.6   | 3.4     |
| PEX13                     | peroxisomal biogenesis factor 13                                                                         | 3.2                                     | -3.0   | 27.0    | 1.3                                      | -1.6   | 4.6     |
| PHLDA2                    | pleckstrin homology-like domain, family A, member 2                                                      | 1.5                                     | 5.2    | 28.3    | 1.9                                      | 3.2    | 21.5    |
| PIN4                      | protein (peptidylprolyl cis/trans isomerase) NIMA-interacting, 4 (parvulin)                              | -2.0                                    | 15.2   | -1.5    | -1.6                                     | 2.3    | -1.5    |

|                                       |                                                                                                         |      |      |      |      |      |      |
|---------------------------------------|---------------------------------------------------------------------------------------------------------|------|------|------|------|------|------|
| PLEKHG2                               | pleckstrin homology domain containing, family G (with RhoGef domain) member 2                           | 1.0  | 2.0  | 26.5 | 1.4  | -1.1 | 3.3  |
| PSORS1C2                              | psoriasis susceptibility 1 candidate 2                                                                  | 6.5  | 3.3  | -1.1 | 10.8 | 3.7  | 2.7  |
| SEC24A                                | SEC24 family, member A (S. cerevisiae)                                                                  | 1.7  | 3.3  | 1.7  | 1.3  | 15.0 | 1.6  |
| SH2D3A                                | SH2 domain containing 3A                                                                                | -1.1 | 1.5  | 22.9 | 1.4  | 3.5  | 2.2  |
| SNORD3B-1 /<br>SNORD3B-2 /<br>SNORD3D | small nucleolar RNA, C/D box 3B-1 / small nucleolar RNA, C/D box 3B-2 / small nucleolar RNA, C/D box 3D | 2.5  | 17.9 | 3.9  | 2.6  | 2.5  | 3.1  |
| SOCS3                                 | suppressor of cytokine signaling 3                                                                      | 2.1  | 12.6 | 17.0 | 2.5  | 4.2  | 3.6  |
| SRSF3                                 | Serine/arginine-rich splicing factor 3                                                                  | 4.2  | 5.1  | -1.0 | 4.0  | 12.4 | 2.2  |
| TDRD3                                 | tudor domain containing 3                                                                               | 2.3  | -1.7 | 27.8 | -1.4 | -1.4 | -1.2 |
| THAP2                                 | THAP domain containing, apoptosis associated protein 2                                                  | 3.0  | 9.2  | 6.8  | 1.9  | 12.9 | 5.0  |
| TNFRSF18                              | tumor necrosis factor receptor superfamily, member 18                                                   | 19.8 | -1.2 | 2.0  | 2.5  | 2.0  | 1.2  |
| TYSND1                                | Trypsin domain containing 1                                                                             | 2.4  | -1.1 | 1.4  | 10.5 | -1.2 | -1.1 |
| VILL                                  | villin-like                                                                                             | 1.3  | -1.9 | 23.7 | 1.1  | -2.0 | 1.6  |

\*The table contains all annotated genes with > factor 10 up-regulation at 30 or 60 min, or > factor 20 at 180 min.

†This (pseudo)gene was withdrawn by NCBI after completion of microarray analyses, because, as stated on the NCBI website, “the model on which it was based was not predicted in a later annotation”. It is located adjacent to the EGR1 gene.
